# Supplementary material for: Machine learning and microsimulation techniques on the prognosis of dementia: A systematic literature review
Source: PubMed Central journal article supplement (PMC5491044; doi:10.1371/journal.pone.0179804), 2017-06-29
Supplement: pone.0179804.s001.pdf [file pone.0179804.s001.pdf]

| Title                                                                                                                                         | Study                              | Conditions Studied | Database Name | Data Analysis Technique | Best Accuracy Achieved |
|-----------------------------------------------------------------------------------------------------------------------------------------------|------------------------------------|--------------------|---------------|-------------------------|------------------------|
| Automated hippocampal shape analysis predicts the onset of dementia in mild cognitive impairment                                              | Costafreda, S. et al. [29]         | AD, MCI            | AddNeuroMed   | ML                      | 85.0%                  |
| Different multivariate techniques for automated classification of MRI data in Alzheimer's disease and mild cognitive impairment               | Aguilar, C. et al. [25]            | AD, MCI            | AddNeuroMed   | ML                      | 84.9%                  |
| An MRI-derived definition of MCI-to-AD conversion for long-term, automatic prognosis of MCI patients                                          | Aksu, Y. et al. [26]               | AD, MCI            | ADNI          | ML                      | 83.00%                 |
| Discriminant analysis of longitudinal cortical thickness changes in Alzheimer's disease using dynamic and network features                    | Li, Y. et al. [39]                 | AD, MCI            | ADNI          | ML                      | 81.7%                  |
| BrainAGE in Mild Cognitive Impaired Patients: Predicting the Conversion to Alzheimer's Disease                                                | Gaser, C. et al. [53]              | AD, MCI            | ADNI          | ML                      | 81.0%                  |
| Domain Transfer Learning for MCI Conversion Prediction                                                                                        | Cheng, B. et al. [28]              | AD, MCI            | ADNI          | ML                      | 79.4%                  |
| Predicting future clinical changes of MCI patients using longitudinal and multimodal biomarkers                                               | Zhang, D. et al. [52]              | AD, MCI            | ADNI          | ML                      | 78.4%                  |
| Deep learning-based feature representation for AD/MCI classification                                                                          | Suk, Heung-II; Shen, Dinggang [51] | AD, MCI            | ADNI          | ML                      | 75.80%                 |
| Anatomically constrained weak classifier fusion for early detection of Alzheimer's disease                                                    | Komlagan, M. et al. [37]           | AD, MCI            | ADNI          | ML                      | 75.6%                  |
| Hierarchical interactions model for predicting Mild Cognitive Impairment (MCI) to Alzheimer's Disease (AD) conversion                         | Li, H. et al. [38]                 | AD, MCI            | ADNI          | ML                      | 74.76%                 |
| Machine learning framework for early MRI-based Alzheimer's conversion prediction in MCI subjects                                              | Moradi, E. et al. [40]             | AD, MCI            | ADNI          | ML                      | 74.74%                 |
| Automatic Prediction of Conversion from Mild Cognitive Impairment to Probable Alzheimer's Disease using Structural Magnetic Resonance Imaging | Nho, K. et al. [41]                | AD, MCI            | ADNI          | ML                      | 72.3%                  |

|                                                                                                                                                                          |                               |         |      |    |        |
|--------------------------------------------------------------------------------------------------------------------------------------------------------------------------|-------------------------------|---------|------|----|--------|
| Manifold population modeling as a neuro-imaging biomarker: application to ADNI and ADNI-GO                                                                               | Guerrero, R. et al. [34]      | AD, MCI | ADNI | ML | 71.0%  |
| Bioprofile analysis: A new approach for the analysis of biomedical data in Alzheimer's disease                                                                           | Escudero, J. et al. [33]      | AD, MCI | ADNI | ML | 68.2%  |
| Inter-modality relationship constrained multi-modality multi-task feature selection for Alzheimer's Disease and mild cognitive impairment identification                 | Liu, F. et al. [50]           | AD, MCI | ADNI | ML | 67.83% |
| Identification of conversion from mild cognitive impairment to Alzheimer's disease using multivariate predictors                                                         | Cui, Y. et al. [32]           | AD, MCI | ADNI | ML | 67.13% |
| Accurate multimodal probabilistic prediction of conversion to Alzheimer's disease in patients with mild cognitive impairment                                             | Young, J. et al. [45]         | AD, MCI | ADNI | ML | 66.7%  |
| Magnetic resonance imaging biomarkers for the early diagnosis of Alzheimer's disease: a machine learning approach                                                        | Salvatore, C. et al. [43]     | AD, MCI | ADNI | ML | 66.0%  |
| How early can we predict Alzheimer's disease using computational anatomy?                                                                                                | Adaszewski, S. et al. [24]    | AD, MCI | ADNI | ML | 63.7%  |
| Evaluation of Plasma Proteomic Data for Alzheimer Disease State Classification and for the Prediction of Progression From Mild Cognitive Impairment to Alzheimer Disease | Llano, D. et al. [47]         | AD, MCI | ADNI | ML | 62.0%  |
| Automatic classification of patients with Alzheimer's disease from structural MRI: a comparison of ten methods using the ADNI database                                   | Cuingnet, R. et al. [31]      | AD, MCI | ADNI | ML | -      |
| Semi-supervised learning in MCI-to-ad conversion prediction - "When is unlabeled data useful?"                                                                           | Moradi, E. et al. [48]        | AD, MCI | ADNI | ML | -      |
| Sparse learning and stability selection for predicting MCI to AD conversion using baseline ADNI data                                                                     | Ye, J. et al. [44]            | AD, MCI | ADNI | ML | -      |
| Predictive markers for AD in a multi-modality framework: an analysis of MCI progression in the ADNI population                                                           | Hinrichs, C. et al. [35]      | AD, MCI | ADNI | ML | -      |
| Predicting conversion from MCI to AD with FDG-PET brain images at different prodromal                                                                                    | Cabral, C. et al. stages [27] | AD, MCI | ADNI | ML | -      |

|                                                                                                                                                             |                                        |          |                                                                                                                                                                         |    |                        |
|-------------------------------------------------------------------------------------------------------------------------------------------------------------|----------------------------------------|----------|-------------------------------------------------------------------------------------------------------------------------------------------------------------------------|----|------------------------|
| Derivation of a new ADAS-cog composite using tree-based multivariate analysis: Prediction of conversion from mild cognitive impairment to alzheimer disease | Llano, D. et al. [56]                  | AD, MCI  | ADNI                                                                                                                                                                    | ML | -                      |
| Applying Automated MR-Based Diagnostic Methods to the Memory Clinic: A Prospective Study                                                                    | Kloeppel, S. et al. [36]               | AD, MCI  | ADNI, Freiburg                                                                                                                                                          | ML | 65.0%                  |
| Prediction of conversion from mild cognitive impairment to Alzheimer disease based on bayesian data mining with ensemble learning                           | Chen, R. et al. [62]                   | AD, MCI  | ADNI, PCD                                                                                                                                                               | ML | 81%                    |
| Automated detection of brain atrophy patterns based on MRI for the prediction of Alzheimer's disease                                                        | Plant, C. et al. [42]                  | AD, MCI  | Clinic of Psychiatry at the Ludwig Maximilian University of Munich                                                                                                      | ML | 95.83%                 |
| An event-based model for disease progression and its application in familial Alzheimer's disease and Huntington's disease                                   | Fonteiijn, H.M. et al. [61]            | AD, HD   | Cognitive Disorders Clinic at the National Hospital for Neurology and Neurosurgery, Multidisciplinary HD Clinic at the National Hospital for Neurology and Neurosurgery | ML | -                      |
| Clinical Decision Trees for Predicting Conversion from Cognitive Impairment No Dementia (CIND) to Dementia in a Longitudinal Population-Based Study         | Ritchie, Lesley J.; Tuokko, Holly [57] | AD, CIND | CSHA                                                                                                                                                                    | ML | 70.2%                  |
| Neural networks for longitudinal studies in Alzheimer's disease                                                                                             | Tandon, R. et al [65]                  | AD, MCI  | LAARC                                                                                                                                                                   | ML | 87.0%                  |
| Morphological hippocampal markers for automated detection of alzheimer's disease and mild cognitive impairment converters in magnetic resonance images      | Ferrarini, L. et al. [46]              | AD, MCI  | Laboratory of Epidemiology, Neuroimaging, and Telemedicine, at the IRCSS San Giovanni di Dio-FBF in Brescia                                                             | ML | 80.0%                  |
| A comparison of three brain atlases for MCI prediction                                                                                                      | Ota, K. et al. [49]                    | AD, MCI  | SEAD-J                                                                                                                                                                  | ML | 77.9%                  |
| Multiplexed immunoassay panel identifies novel CSF biomarkers for Alzheimer's disease diagnosis and prognosis                                               | Craig S. et al. [30]                   | AD, MCI  | WU-ADRC                                                                                                                                                                 | ML | -                      |
| Modeling screening, prevention, and delaying of Alzheimer's disease: An early-stage decision analytic model                                                 | Furiak, N.M. et al. [73]               | AD       | -                                                                                                                                                                       | MS | No Prognostic accuracy |
| Estimation and validation of a multiattribute model of alzheimer disease progression                                                                        | Stallard, E. et al. [74]               | AD       | Predictor's Study (1989-2001) and Predictor's Study 2 (1997-2007)                                                                                                       | MS | No Prognostic accuracy |
